# Supplementary material for: Adhesive contact of a rigid circular cylinder to a soft elastic substrate – the role of surface tension
Source: Royal Society of Chemistry journal article supplement (doi:10.1039/c5sm00008d), 2015-01-01
Supplement: c5sm00008d1.pdf [file c5sm00008d1.pdf]

## Supplementary Materials

### Numerical Implementation

The governing equation of this problem is equation (24):

$$2\pi\beta\bar{v}''(\bar{x}) = \int_1^{\infty} \bar{v}''(\bar{x}) \ln|\bar{t}^2 - \bar{x}^2| d\bar{t} + \left( 2 + \bar{x} \ln \left| \frac{\bar{x}-1}{\bar{x}+1} \right| - \ln|\bar{x}^2 - 1| \right), \quad |\bar{x}| > 1$$

Which is a Fredholm integral equation of the second kind defined on the interval  $(1, \infty)$ . To solve the equation numerically, we first change the interval to be finite by taking  $\bar{t} = \tan\left(\frac{\rho}{2}\right)$ ,  $\bar{x} = \tan\left(\frac{q}{2}\right)$ . Now, the integral is changed to:

$$\int_1^{\infty} \bar{v}''(\bar{t}) \ln|\bar{t}^2 - \bar{x}^2| d\bar{t} = \int_{\pi/2}^{\pi} \frac{\bar{v}''\left(\tan\left(\frac{\rho}{2}\right)\right)}{2\cos^2\left(\frac{\rho}{2}\right)} \ln\left|\tan\left(\frac{\rho}{2}\right)^2 - \tan\left(\frac{q}{2}\right)^2\right| d\rho \quad \text{\textbackslash* MERGEFORMAT (A1)}$$

Define  $F(\rho) = \frac{\bar{v}''\left(\tan\left(\frac{\rho}{2}\right)\right)}{2\cos^2\left(\frac{\rho}{2}\right)}$ ,  $G(q) = 2 + \tan\left(\frac{q}{2}\right) \ln\left|\frac{\tan\left(\frac{q}{2}\right)-1}{\tan\left(\frac{q}{2}\right)+1}\right| - \ln\left|\tan^2\left(\frac{q}{2}\right)-1\right|$ , equation (24) is changed

into:

$$\int_{\pi/2}^{\pi} F(\rho) \ln\left|\tan\left(\frac{\rho}{2}\right)^2 - \tan\left(\frac{q}{2}\right)^2\right| d\rho - 4\pi\beta\cos^2\left(\frac{q}{2}\right)F(q) = -G(q) \quad \text{\textbackslash* MERGEFORMAT (A2)}$$

The integral interval is now changed to  $(\pi/2, \pi)$ . Divide this interval into  $n$  subinterval

$(\rho_1, \rho_2], \dots, [\rho_i, \rho_{i+1}], \dots, [\rho_n, \rho_{n+1})$  with equal length  $\Delta = \pi / (2n)$  and take  $q_i = \frac{\rho_i + \rho_{i+1}}{2}$ , where

$\rho_i = (i-1)\Delta$ . Based on this discretization, the integral  $\int_{\pi/2}^{\pi} F(\rho) \ln\left|\tan\left(\frac{\rho}{2}\right)^2 - \tan\left(\frac{q}{2}\right)^2\right| d\rho$  can be evaluated

approximately as:

$$\begin{aligned}
& \int_{\pi/2}^{\pi} F(p) \ln \left| \tan\left(\frac{p}{2}\right) - \tan\left(\frac{q}{2}\right) \right| du \\
&= \int_{\pi/2}^{\pi} F(p) \ln \left| \frac{\tan\left(\frac{p}{2}\right) - \tan\left(\frac{q}{2}\right)}{p-q} \right| dp + \int_{\pi/2}^{\pi} F(p) \ln |p-q| dp \quad \backslash * \text{ MERGEFORMAT (A3)} \\
&\approx \sum_{j=1}^N F(q_j) \int_{p_j}^{p_{j+1}} \ln \left| \frac{\tan\left(\frac{p}{2}\right) - \tan\left(\frac{q}{2}\right)}{p-q} \right| dp + \sum_{j=1}^N F(q_j) \int_{p_j}^{p_{j+1}} \ln |p-q| dp
\end{aligned}$$

According to \\* MERGEFORMAT (A3), equation \\* MERGEFORMAT (A2) can be changed into discretized form:

$$\sum_{i=1}^n K_{ij} F(q_j) = -G(q_i) \quad \backslash * \text{ MERGEFORMAT (A4)}$$

Where  $K_{ij} = \int_{p_j}^{p_{j+1}} \ln \left| \frac{\tan\left(\frac{p}{2}\right) - \tan\left(\frac{q_i}{2}\right)}{p-q_i} \right| dp + \int_{p_j}^{p_{j+1}} \ln |p-q_i| dp - 4\pi\beta \cos^2\left(\frac{q_i}{2}\right) \delta_{ij}$  (no sum on i). The

integral can be easily evaluated and therefore  $K_{ij}$  can be expressed as:

$$K_{ij} = \begin{cases} (p_{j+1} - p_j) \ln \left| \frac{\tan^2(q_j/2) - \tan^2(q_i/2)}{q_j - q_i} \right| \\ -(p_{j+1} - p_j) + (p_{j+1} - q_j) \ln |p_{j+1} - q_i| + (q_i - p_j) \ln |p_j - q_i|, i \neq j \\ (p_{j+1} - p_j) \ln \left| \frac{\tan\left(\frac{q_i}{2}\right)}{\cos^2\left(\frac{q_i}{2}\right)} \right| - 4\pi\beta \cos^2\left(\frac{q_i}{2}\right) \\ -(p_{j+1} - p_j) + (p_{j+1} - q_j) \ln |p_{j+1} - q_i| + (q_i - p_j) \ln |p_j - q_i|, i=j \end{cases} \quad \backslash * \text{ MERGEFORMAT (A5)}$$

Substitute equation \\* MERGEFORMAT (A5) into equation \\* MERGEFORMAT (A4),  $F(q_j)$  can be solved numerically and  $\bar{v}''(\tan(q_j/2)) = 2F(q_j) \cos^2(q_j/2)$ .

**Calculation of  $\bar{\Lambda}_H$ :**

First, we need to calculate the Compliance C:

$$\begin{aligned}
C &= \frac{d\delta_H}{dP_H} = \frac{d\delta_H/da}{dP_H/da} \\
&= \frac{d(\overline{\delta_H}a^2/R)/d(\overline{a}R)}{d(P_H\pi\mu a^2/R)/d(\overline{a}R)} = \frac{1}{\pi\mu} \frac{\overline{a}d\overline{\delta_H}/d\overline{a} + 2\overline{\delta_H}}{\overline{a}d\overline{P_H}/d\overline{a} + 2\overline{P_H}}
\end{aligned} \tag{A6}$$

Where  $\overline{a} = a/R$ . It is easy to show that  $\overline{\Lambda}_H = 2\pi\mu a\Lambda_H$  is calculated as:

$$\overline{\Lambda}_H = -2 \frac{(2\overline{P_H} - \beta \frac{d\overline{P_H}}{d\beta}) (\beta^2 \frac{\partial^2 \overline{\delta_H}}{\partial \beta^2} + 2\beta\overline{c} \frac{\partial^2 \overline{\delta_H}}{\partial \beta \partial \overline{c}} + \overline{c}^2 \frac{\partial^2 \overline{\delta_H}}{\partial \overline{c}^2} - \beta \frac{\partial \overline{\delta_H}}{\partial \beta} - \overline{c} \frac{\partial \overline{\delta_H}}{\partial \overline{c}}) + (\beta \frac{\partial \overline{\delta_H}}{\partial \beta} + \overline{c} \frac{\partial \overline{\delta_H}}{\partial \overline{c}} - 2\overline{\delta_H}) (\beta^2 \frac{d^2 \overline{P_H}}{d\beta^2} - \beta \frac{d\overline{P_H}}{d\beta})}{(2\overline{P_H} - \beta \frac{d\overline{P_H}}{d\beta})^2} \tag{A7}$$

Since  $\overline{P_H}$  is only a function of  $\beta$  and  $\overline{\delta_H}$  is a function of  $\beta$  and  $\overline{c}$ ,  $\overline{\Lambda}_H$  is at most a function of  $\beta$  and  $\overline{c}$  (or equivalently,  $\beta, c/R, \overline{a}$ ). However, since the general JKR solution can't depend on where we select our dictum plane,  $\overline{\Lambda}_H$  can only be a function of  $\beta$ . To prove this point, different values of  $c/R$  and  $a/R$  are taken to compute  $\overline{\Lambda}_H$ :

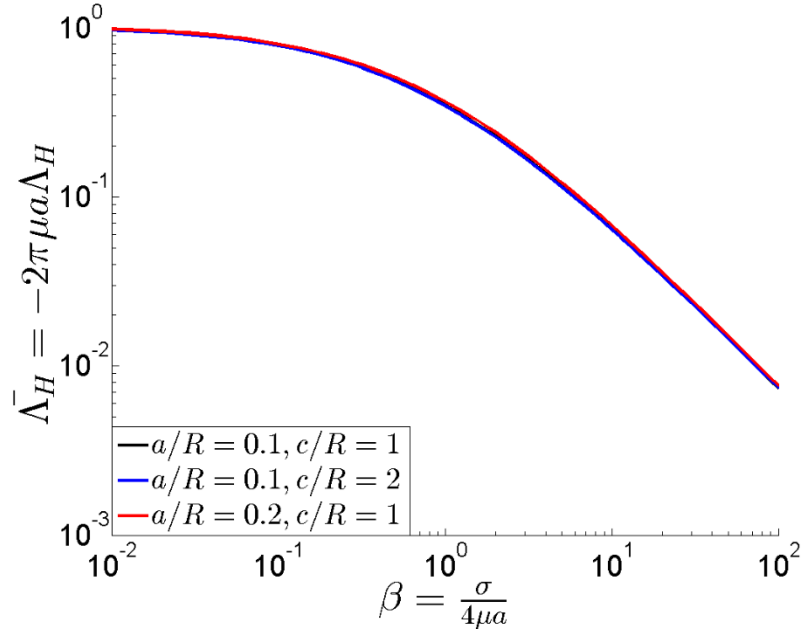

From the plot shown above, it can be seen that different value of  $c/R$  and  $a/R$  result in almost same  $\overline{\Lambda}_H - \beta$  curve. This curve can be fitted by:

$$\overline{\Lambda}_H(\beta) = \frac{\pi\beta^2 + 9.102\beta + 1}{4\beta^3 + 20.82\beta^2 + 12.75\beta + 1} \tag{A8}$$
